# Supplementary material
Source: PubMed Central journal article supplement (PMC5714283)
Supplement: EHP347.s001.acco.pdf [file EHP347.s001.acco.pdf]

**Note to readers with disabilities:** *EHP* strives to ensure that all journal content is accessible to all readers. However, some figures and Supplemental Material published in *EHP* articles may not conform to [508 standards](#) due to the complexity of the information being presented. If you need assistance accessing journal content, please contact [ehponline@niehs.nih.gov](mailto:ehponline@niehs.nih.gov). Our staff will work with you to assess and meet your accessibility needs within 3 working days.

## Supplemental Material

### **Genome-Wide Association Study of Susceptibility to Particulate Matter-Associated QT Prolongation**

Rahul Gondalia, Christy L. Avery, Melanie D. Napier, Raúl Méndez-Giráldez, James D. Stewart, Colleen M. Sitlani, Yun Li, Kirk C. Wilhelmsen, Qing Duan, Jeffrey Roach, Kari E. North, Alexander P. Reiner, Zhu-Ming Zhang, Lesley F. Tinker, Jeff D. Yanosky, Duanping Liao, Eric A. Whitsel

#### **Table of Contents**

**Table S1.** Genotyping, quality control, imputation & analysis, by study / subpopulation

**Table S2.** Sensitivity of the PM<sub>10</sub> x SNP interaction

**Figure S1.** Quantile-Quantile (QQ) plot of observed versus expected  $-\log_{10} P$ -values of each SNP from the trans-ethnic, fixed-effects meta-analysis of the SNP x PM<sub>10</sub> interactions. Lambda is the genomic inflation factor.

**Figure S2.** A) Predicted mean (95% confidence interval) QT (ms) per unit increase in the coded allele (T) dosage of rs1619661 at PM<sub>10</sub> concentrations dichotomized at  $\leq$  and  $>$  the 50<sup>th</sup> – 90<sup>th</sup> percentiles (P50, P60, P70, P80, P90) and the 1987-2006 National Ambient Air Quality Standard (NAAQS\*) for annual PM<sub>10</sub> (50  $\mu\text{g}/\text{m}^3$ ), while adjusting for age, geographic region or center, season, calendar year, RR interval, and ancestry. B) Distribution of observed ambient PM<sub>10</sub> concentrations labelled with the PM<sub>10</sub> dichotomizations.

**Figure S3.** UCSC Genome Browser displaying rs1619661 (highlighted), associated SNPs (linkage disequilibrium  $\geq 0.8$ ), and tracks representing DNase1 hypersensitivity and DNA methylation in cardiac tissues.

**Supplemental Material References**

**Table S1. Genotyping, Quality Control, Imputation & Analysis, by Study / Subpopulation.**

| Study                   | Race / Ethnicity | Genotyping Platform                             | Genotype Calling Software | Genotype Filters                                                   | Imputation Software | NCBI Build        | Reference Panel |
|-------------------------|------------------|-------------------------------------------------|---------------------------|--------------------------------------------------------------------|---------------------|-------------------|-----------------|
| ARIC                    | Black            | Affymetrix GeneChip SNP Array 6.0               | Birdseed                  | Call rate $\leq$ 90%<br>MAF $<$ 1%                                 | MaCH v1.0.16        | HapMap 2 Build 36 | YRI/CEU 1:1     |
| ARIC                    | White            | Affymetrix GeneChip SNP Array 6.0               | Birdseed                  | Call rate $\leq$ 95%<br>HWE $p < 1 \times 10^{-6}$<br>MAF $<$ 1%   | MaCH v1.0.16        | HapMap 2 Build 36 | CEU             |
| WHI GARNET <sup>a</sup> | White            | Illumina Human Omni1-Quad v1-0 B                | BeadStudio v3.1.3.0       | Call rate $\leq$ 98%<br>HWE $p < 1 \times 10^{-4}$                 | BEAGLE v3.3.1       | 1000G v3 3/2012   | EUR             |
| WHI MOPMAP <sup>a</sup> | White            | Affymetrix Axiom Genome-Wide Human CEU I        | Birdseed                  | Call rate $\leq$ 90%<br>HWE $p < 1 \times 10^{-6}$<br>MAF $<$ 0.5% | MaCH minimac        | Hapmap 2 Build 36 | CEU             |
| WHI SHARe               | Black            | Affymetrix GeneChip SNP Array 6.0               | Birdseed                  | Call rate $\leq$ 95%<br>HWE $p < 1 \times 10^{-6}$<br>MAF $<$ 1%   | MaCH v1.0.16        | HapMap 2 Build 36 | YRI/CEU 1:1     |
| WHI SHARe               | Hispanic         | Affymetrix GeneChip SNP Array 6.0               | Birdseed                  | Call rate $\leq$ 95%<br>HWE $p < 1 \times 10^{-6}$<br>MAF $<$ 1%   | MaCH v1.0.16        | 1000G v3 3/2012   | All ancestries  |
| WHI WHIMS               | White            | Human OmniExpress Exome-8v1_B Genome-Wide Human | Birdseed                  | Call rate $\leq$ 98%<br>HWE $p < 1 \times 10^{-4}$<br>MAF $<$ 1%   | MaCH minimac        | Hapmap 2 Build 36 | CEU             |

Abbreviations: ARIC, Atherosclerosis Risk in Communities study; CEU, Utah residents with northern and western European ancestry; EUR, European; GARNET, Genome-wide Association Research Network into Effects of Treatment; HWE, Hardy-Weinberg equilibrium; MAF, minor allele frequency; MOPMAP, Modification of PM-Mediated Arrhythmogenesis in Populations; SHARe, SNP Health Association Resource; WHI, Women's Health Initiative; WHIMS, Women's Health Initiative Memory Study; YRI, Yoruba in Ibadan, Nigeria

<sup>a</sup>Controls

**Table S2. Analysis of Predicted Mean QT (ms) by Genotype and PM<sub>10</sub> exposure**

| <b>rs1619661 Genotype</b> | <b>PM<sub>10</sub></b> | <b>N Participants</b> | <b>Predicted QT</b> | <b>95% CI</b> |
|---------------------------|------------------------|-----------------------|---------------------|---------------|
| CC (1.6%) <sup>a</sup>    | ≤ P90                  | 309                   | 402                 | 401, 403      |
|                           | > P90                  | 34                    | 397                 | 396, 399      |
| CT (21.8%) <sup>a</sup>   | ≤ P90                  | 4348                  | 403                 | 402, 403      |
|                           | > P90                  | 483                   | 401                 | 400, 401      |
| TT (76.7%) <sup>a</sup>   | ≤ P90                  | 15286                 | 403                 | 403, 403      |
|                           | > P90                  | 1698                  | 404                 | 403, 404      |
| Total (100%)              |                        | 22158                 |                     |               |

Abbreviations: CI, confidence interval; N, number; P90, 90<sup>th</sup> percentile; PM<sub>10</sub>, particulate matter < 10 μm in diameter

<sup>a</sup> Estimated genotype frequency under Hardy-Weinberg equilibrium

**Table S3. Sensitivity of the PM<sub>10</sub> x rs1619661 interaction**

| Sensitivity to           | PM Size                        | PM Threshold (percentile) | PM Averaging Period | Additional Adjustment or Restriction | Interaction Estimate (SE) <sup>a</sup> | <i>P</i>                                        |
|--------------------------|--------------------------------|---------------------------|---------------------|--------------------------------------|----------------------------------------|-------------------------------------------------|
| No changes               | PM <sub>10</sub>               | 90 <sup>th</sup>          | 2 days              |                                      | 2.55 (0.46)                            | 2.11x10 <sup>-8</sup>                           |
| PM threshold             | PM <sub>10</sub>               | 80 <sup>th</sup>          | 2 days              |                                      | 1.70 (0.36)                            | 2.10x10 <sup>-6</sup>                           |
|                          | PM <sub>10</sub>               | 70 <sup>th</sup>          | 2 days              |                                      | 1.48 (0.33)                            | 9.48x10 <sup>-6</sup>                           |
|                          | PM <sub>10</sub>               | 60 <sup>th</sup>          | 2 days              |                                      | 1.05 (0.30)                            | 5.16x10 <sup>-4</sup>                           |
|                          | PM <sub>10</sub>               | 50 <sup>th</sup>          | 2 days              |                                      | 0.71 (0.30)                            | 1.65x10 <sup>-2</sup>                           |
|                          | PM <sub>10</sub>               | 50 µg/m <sup>3</sup>      | 2 days              |                                      | 2.84 (0.51)                            | 2.04x10 <sup>-8</sup>                           |
| PM averaging period      | PM <sub>10</sub>               | 90 <sup>th</sup>          | 1 week              |                                      | 1.18 (0.45)                            | 9.44x10 <sup>-3</sup>                           |
|                          | PM <sub>10</sub>               | 90 <sup>th</sup>          | 2 weeks             |                                      | 1.29 (0.46)                            | 4.77x10 <sup>-3</sup>                           |
|                          | PM <sub>10</sub>               | 90 <sup>th</sup>          | 3 weeks             |                                      | 1.18 (0.46)                            | 1.00x10 <sup>-2</sup>                           |
|                          | PM <sub>10</sub>               | 90 <sup>th</sup>          | 1 month             |                                      | 0.80 (0.45)                            | 7.65x10 <sup>-2</sup>                           |
| PM size                  | PM <sub>2.5</sub> <sup>b</sup> | 90 <sup>th</sup>          | 1 month             |                                      | 0.80 (0.51)                            | 1.14x10 <sup>-1</sup>                           |
| Additional adjustment    | PM <sub>10</sub>               | 90 <sup>th</sup>          | 2 days              | nSES <sup>c</sup>                    | 2.50 (0.46)                            | 4.78x10 <sup>-8</sup>                           |
|                          | PM <sub>10</sub>               | 90 <sup>th</sup>          | 2 days              | Meteorological <sup>d</sup>          | 2.60 (0.45)                            | 9.85x10 <sup>-9</sup>                           |
|                          | PM <sub>10</sub>               | 90 <sup>th</sup>          | 2 days              | Lifestyle factors <sup>c</sup>       | 2.56 (0.45)                            | 1.85x10 <sup>-8</sup>                           |
| β-antagonist restriction | PM <sub>10</sub>               | PM <sub>10</sub>          | 2 days              | All <sup>cde</sup>                   | 2.57 (0.46)                            | 2.96x10 <sup>-8</sup>                           |
|                          | PM <sub>10</sub>               | PM <sub>10</sub>          | 2 days              | Users<br>Non-Users                   | -0.61 (1.47)<br>2.91 (0.47)            | 6.78x10 <sup>-1</sup><br>6.59x10 <sup>-10</sup> |

Abbreviations: PM, particulate matter; PM<sub>2.5</sub>, PM < 2.5 µm in diameter; PM<sub>10</sub>, particulate matter < 10 µm in diameter; nSES, neighborhood socioeconomic status.

<sup>a</sup>Trans-ethnic, fixed-effects meta-analysis without genomic control implemented in METAL.

<sup>b</sup>Monthly average PM<sub>2.5</sub> exposure at geocoded participant address estimated by a spatiotemporal model with GIS-based predictors.

<sup>c</sup>Neighborhood socioeconomic status measured by a sum of Z scores of: median household income, % households with interest dividends or rent income, % age 25+ with high school degree, % age 16+ with professional, managerial, or executive occupations, median value of owner-occupied housing units.

<sup>d</sup>Temperature (°C); dew point (°C); barometric pressure (kPa)

<sup>e</sup>Smoker status (current, former, never), alcohol drinker status (current, former, never), total caloric intake (kcal), sedentary lifestyle

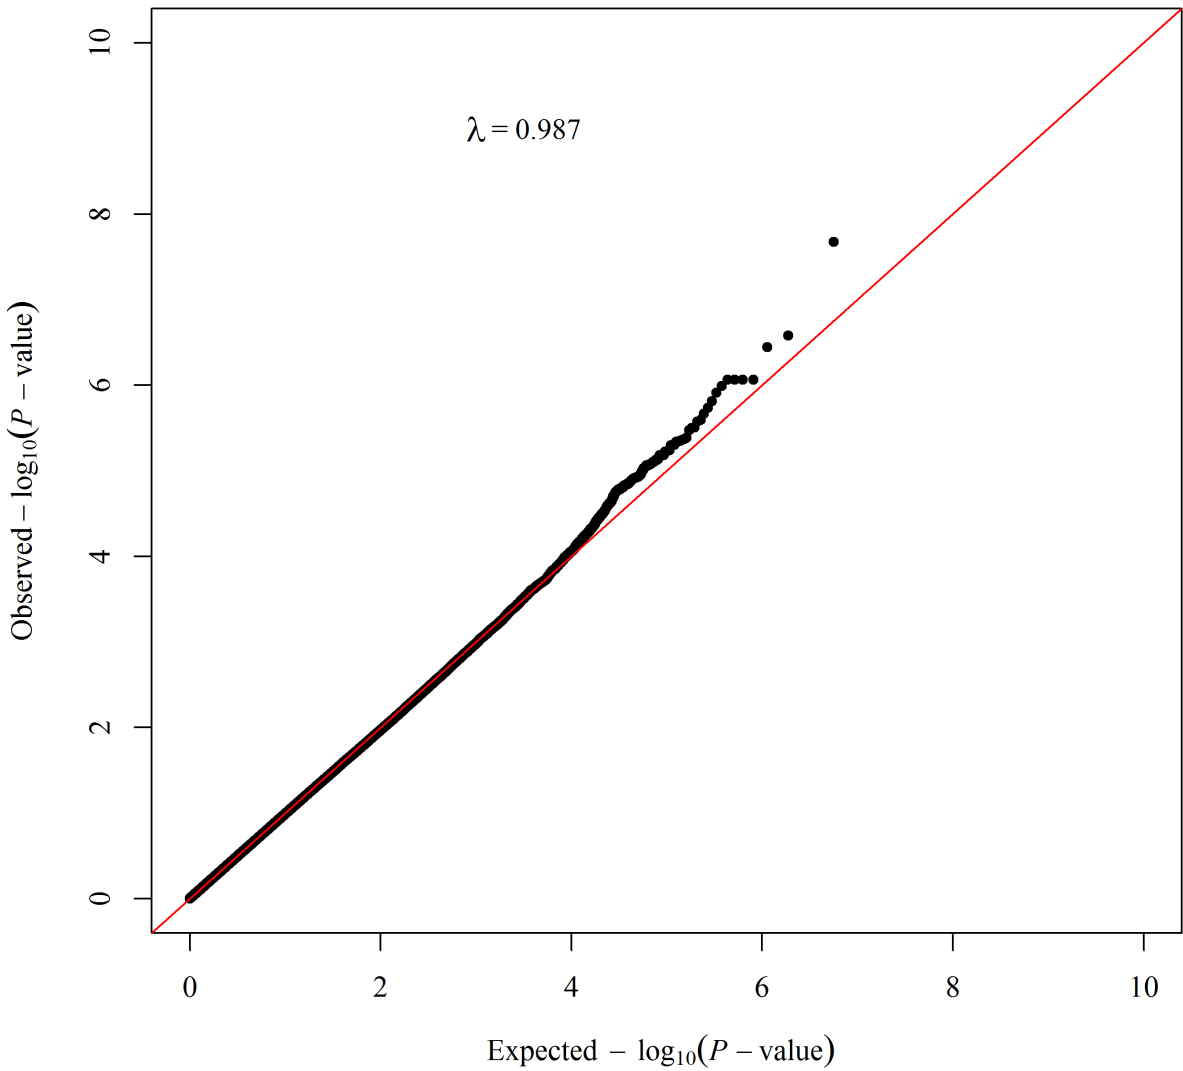

**Figure S1.** Quantile-Quantile (QQ) plot of observed versus expected  $-\log_{10} P$ -values of each SNP from the trans-ethnic, fixed-effects meta-analysis of the SNP x PM<sub>10</sub> interactions. Lambda ( $\lambda$ ) is the genomic inflation factor.

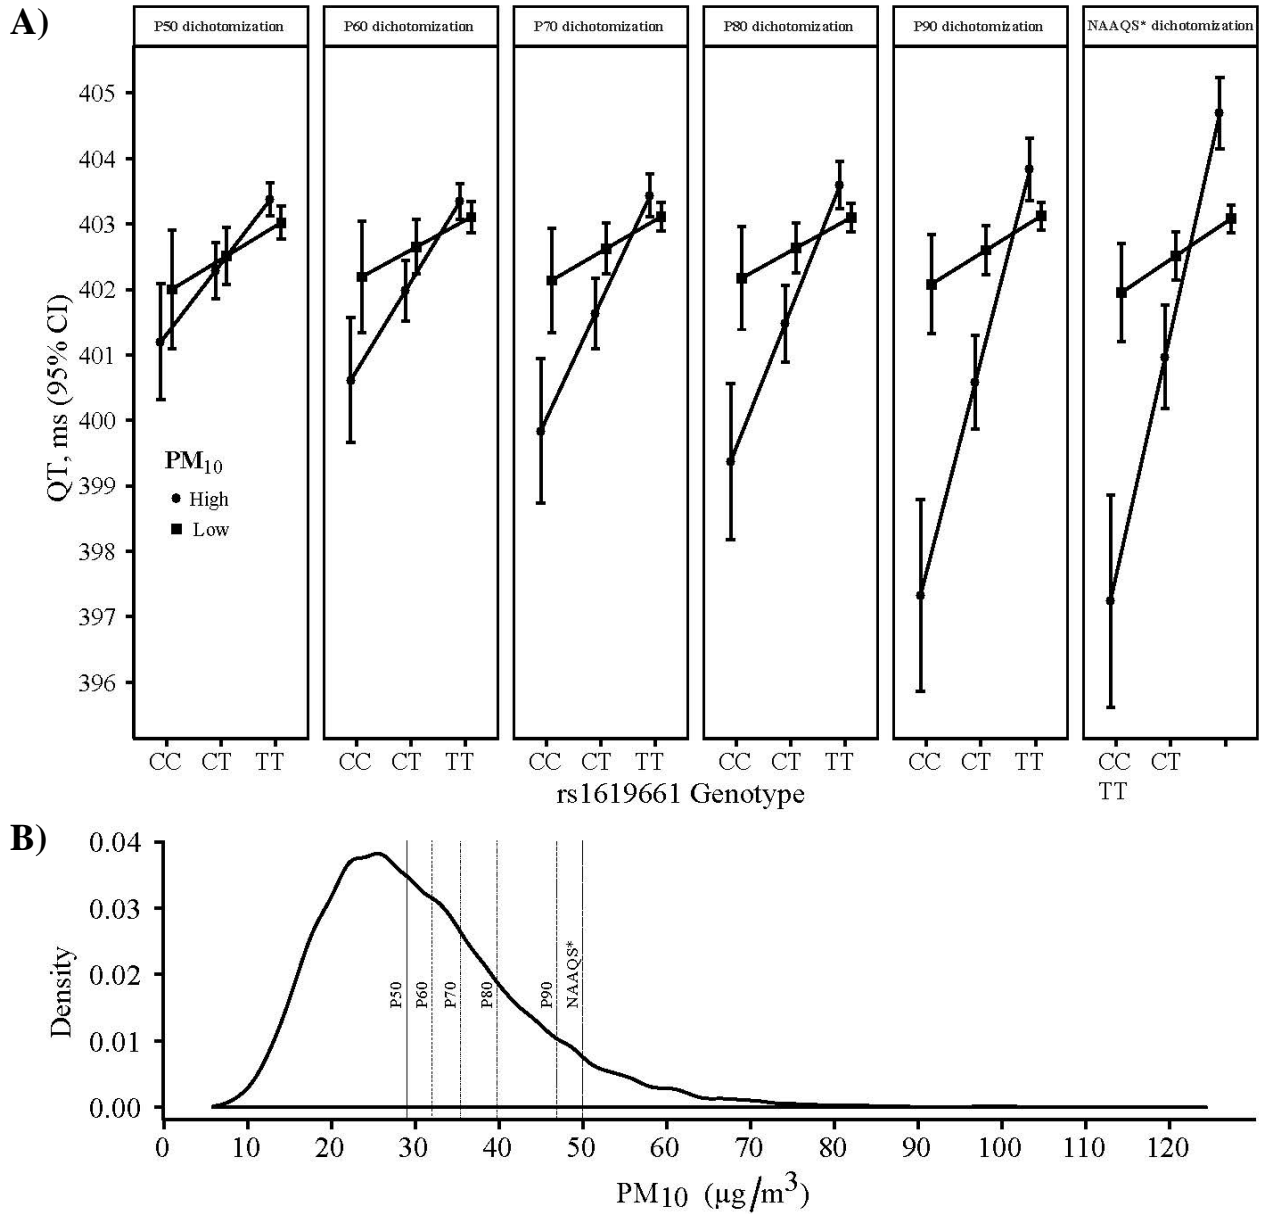

**Figure S2.** A) Predicted mean (95% confidence interval) QT (ms) per unit increase in the coded allele (T) dosage of rs1619661 at PM<sub>10</sub> concentrations dichotomized at  $\leq$  and  $>$  the 50<sup>th</sup> – 90<sup>th</sup> percentiles (P50, P60, P70, P80, P90) and the 1987-2006 National Ambient Air Quality Standard (NAAQS\*) for annual PM<sub>10</sub> (50  $\mu\text{g}/\text{m}^3$ ), while adjusting for age, geographic region or center, season, calendar year, RR interval, and ancestry. B) Distribution of observed ambient PM<sub>10</sub> concentrations labelled with the PM<sub>10</sub> dichotomizations.



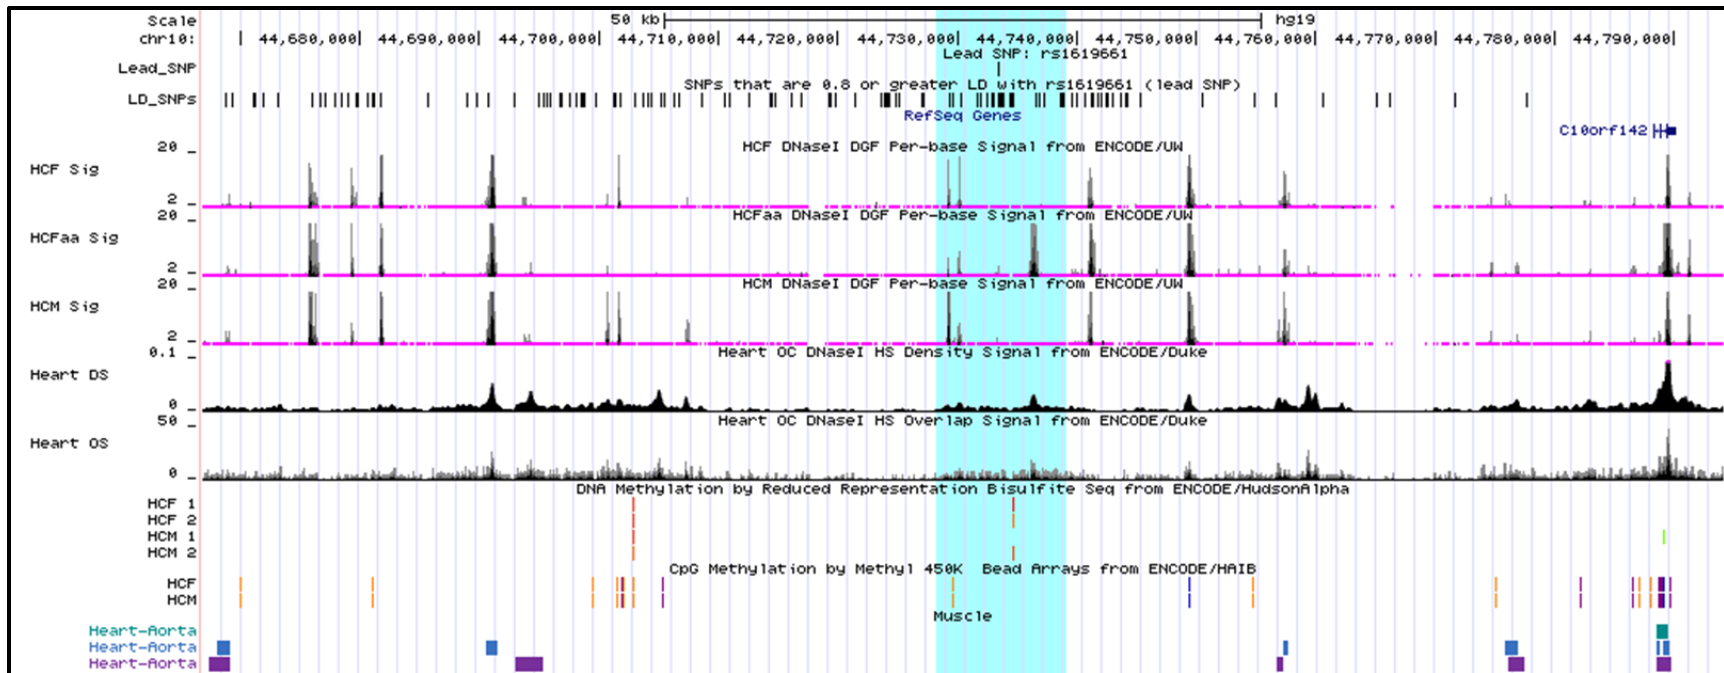

**Figure S3.** UCSC Genome Browser displaying rs1619661 (highlighted), associated SNPs (linkage disequilibrium  $\geq 0.8$ ), and tracks representing DNase1 hypersensitivity and DNA methylation in cardiac tissues.

Tracks, from top to bottom:

**Lead SNP:** The SNP with a genome-wide significant association in this study, rs1619661.

**LD SNP:** SNPs associated with rs1619661 (linkage disequilibrium  $> 0.8$ ), from HaploReg (Ward and Kellis 2012).

**HCF Sig:** Human cardiac fibroblast deoxyribonuclease 1 digital genomic footprinting (DNase1 DGF) per base signal, from ENCODE/UW.

**HCFaa Sig:** Human cardiac (adult atrial) fibroblast DNase1 DGF per base signal, from ENCODE/UW.

**HCM Sig:** Human cardiac myocyte DNase1 DGF per-base signal, from ENCODE/UW.

**Heart DS/OS:** Heart tissue DNase1 hypersensitivity density / overlap signals, from ENCODE/Duke.

**HCF & HCM 1/2:** Human cardiac fibroblast & myocyte DNA methylation by reduced representation bisulfite sequencing (Cokus et al. 2008), from ENCODE/HudsonAlpha. Percent of sequenced molecules that are DNA methylated: red (100%), yellow (50%), green (0%).

**HCF & HCM:** Human cardiac fibroblast & myocyte CpG methylation by Methyl 450K Bead Arrays from ENCODE/HAIB. Methylation status: orange (methylated), purple (partially methylated), bright blue (unmethylated), black (NA).

**Heart-Aorta:** Human heart aorta DNA methylation by bisulfite sequencing analysis pipeline, MethPipe (Song et al. 2013). Methylation status: green (partially methylated region), blue (hypomethylated region), purple (allele-specific methylated regions)

### **Supplemental Material References**

Cokus SJ, Feng S, Zhang X, Chen Z, Merriman B, Haudenschild CD, et al. 2008. Shotgun bisulphite sequencing of the arabidopsis genome reveals DNA methylation patterning. *Nature* 452:215-219.

Song Q, Decato B, Hong EE, Zhou M, Fang F, Qu J, et al. 2013. A reference methylome database and analysis pipeline to facilitate integrative and comparative epigenomics.

Ward LD, Kellis M. 2012. Haploreg: A resource for exploring chromatin states, conservation, and regulatory motif alterations within sets of genetically linked variants. *Nucleic acids research* 40:D930-934.
